# Supplementary material
Source: PubMed Central journal article supplement (PMC4168342)
Supplement: gf013sup_10-1055-s-0031-1280428.pdf [file gf013sup_10-1055-s-0031-1280428.pdf]

# Unterschiede in der Gestationsdiabetesinzidenz im Vergleich zwischen türkischstämmigen und deutschen Frauen: Eine Analyse von Abrechnungsdaten der AOK Berlin, 2005–2007

Differences in the Incidence of Gestational Diabetes between Women of Turkish and German Origin: An Analysis of Health Insurance Data From a Statutory Health Insurance in Berlin, Germany (AOK), 2005–2007

**Autoren** A. Reeske<sup>1</sup>, H. Zeeb<sup>1</sup>, O. Razum<sup>2</sup>, J. Spallek<sup>2</sup>

**Institute** <sup>1</sup> BIPS – Institut für Epidemiologie und Präventionsforschung, Abteilung Prävention und Evaluation, Fachgruppe Sozialepidemiologie, Bremen  
<sup>2</sup> Universität Bielefeld, Fakultät für Gesundheitswissenschaften, AG Epidemiologie & International Public Health, Bielefeld

## Schlüsselwörter

- Migration und Gesundheit
- Türkei
- Schwangerschaft
- perinatale Gesundheit
- Gestationsdiabetes

## Key words

- migration and health
- Turkey
- pregnancy
- perinatal health
- gestational diabetes

**eingereicht** 24.10.2011  
**revidiert** 2.11.2011  
**akzeptiert** 13.11.2011

## Bibliografie

**DOI** <http://dx.doi.org/10.1055/s-0031-1280428>  
Geburtsh Frauenheilk 2012; 72  
© Georg Thieme Verlag KG  
Stuttgart · New York ·  
ISSN 0016-5751

## Korrespondenzadresse

**Anna Reeske**  
Abteilung Prävention und Evaluation, Fachgruppe Sozialepidemiologie  
BIPS – Institut für Epidemiologie und Präventionsforschung  
Achterstraße 30  
28359 Bremen  
reeske@bips.uni-bremen.de

## Zusammenfassung

**Hintergrund:** Gestationsdiabetes erhöht das mütterliche und kindliche Risiko für Komplikationen und nachhaltige Gesundheitsschäden. Eine Untersuchung von Unterschieden in der Inzidenz von Gestationsdiabetes zwischen türkischstämmigen und deutschen Frauen kann Risikogruppen identifizieren und auf einen erhöhten Bedarf an kultursensibler Diabetesaufklärung und -versorgung im Rahmen der Schwangerschaft hinweisen.

**Methode:** Ausgewertet wurden alle schwangerschaftsbezogenen Abrechnungsdaten von bei der AOK Berlin versicherten türkischstämmigen Frauen für den Zeitraum 2005–2007, die durch Anwendung eines Namensalgorithmus identifiziert wurden. Als Vergleichsgruppe diente eine Zufallsauswahl von bei der AOK Berlin versicherten deutschen Frauen.

**Ergebnisse:** Nach Ausschluss von Aborten und Mehrlingsgeburten wurden die Datensätze von insgesamt 3338 Schwangerschaften ausgewertet. Türkischstämmige Frauen hatten mit 183 pro 1000 Schwangerschaften eine signifikant höhere Gestationsdiabetesinzidenz als deutsche Frauen (138 pro 1000 Schwangerschaften). Regressionsanalysen zeigen, dass türkischstämmige Frauen mit Adipositas das höchste Risiko für Gestationsdiabetes hatten (OR = 2,67; 95%-Konfidenzintervall 1,97–3,60).

**Schlussfolgerung:** Adipositas spielt eine wichtige Rolle in der Erklärung einer höheren Inzidenz von Gestationsdiabetes, besonders bei jüngeren türkischen Frauen. Diese Ergebnisse sollten eine Diskussion darüber anregen, ob die Aufklärung über Risikofaktoren wie Diabetes im Rahmen der Schwangerenvorsorge ausreichend auf die Bedürfnisse von Migrantinnen ausgerichtet ist. Weitere Forschung ist nötig, um mögliche Unterschiede im unerkannten und vor allem im unzureichend behandelten Gestationsdiabetes zwischen türkischen und deutschen Frauen zu untersuchen.

## Abstract

**Background:** Gestational diabetes increases the risk of maternal and infant complications and long-term health effects. A study of differences in the incidence of gestational diabetes between women of Turkish and German origin can identify high risk groups and may indicate the need for culturally sensitive diabetes information and treatment during pregnancy.

**Method:** We analysed all pregnancy related health insurance data from the AOK Berlin (a statutory health insurance in Berlin) based on data from 2005 to 2007, using a name algorithm to identify cases with Turkish migrant background. A group of German women insured with the AOK Berlin served as a comparison group.

**Results:** After exclusion of miscarriages and multiple births the data set comprised 3338 pregnancies in total. The incidence of gestational diabetes was significantly higher in women of Turkish origin with 183 per 1000 pregnancies than in German women (138 per 1000 pregnancies). Regression analyses showed that women of Turkish origin with obesity were at the highest risk of gestational diabetes (OR = 2.67; 95% confidence interval 1.97–3.60).

**Conclusion:** Obesity is an important factor in explaining the higher incidence of gestational diabetes in women of Turkish origin, especially among young Turkish women. These findings should stimulate discussion as to whether or not information about risk factors such as diabetes within the scope of prenatal care adequately addresses the needs of migrant women. Further research is needed to identify potential differences in undetected and primarily in insufficiently treated gestational diabetes between Turkish and German women.

## Hintergrund

Gestationsdiabetes wird definiert als erstmals in der Schwangerschaft auftretende bzw. erstmals entdeckte Glukoseintoleranz [1]. Ein zu spät oder gar nicht erkannter und dadurch unbehandelter Gestationsdiabetes erhöht das kindliche Risiko für intrauterinen Fruchttod, fetale Makrosomien mit diabetischer Fetopathie oder Frühgeburtlichkeit deutlich [2–3]. Folgen von Gestationsdiabetes während der Schwangerschaft können auf mütterlicher Seite v. a. schwangerschaftsinduzierte Hypertonie und Präeklampsie sein. Darüber hinaus besteht die Gefahr einer späteren Manifestation von Diabetes mellitus bei der Mutter [1]. Aus Sicht der Life-Course-Epidemiologie [4] erhöht Gestationsdiabetes aber auch das Risiko von Gesundheitsschäden in späteren Lebensphasen des Kindes, wie z. B. Übergewicht und Adipositas im Kindes- und Jugendalter [5].

Die deutsche Perinatalstatistik, die knapp 99% der Krankenhausgeburten in Deutschland abbildet, berichtete im Jahr 2009 rund 22 000 Fälle von Schwangerschaftsdiabetes (3,4% aller Schwangerschaften) [6]. Schätzungsweise 90% der Fälle von Gestationsdiabetes werden jedoch gar nicht erkannt, vor allem weil es in Deutschland kein routinemäßiges Screening für Gestationsdiabetes im Rahmen der Schwangerenvorsorge gibt [6]. Die Prävalenz von Gestationsdiabetes wird in Deutschland auf bis zu 8% geschätzt [3, 7, 8]. In Hochrisikogruppen – hierzu könnten Frauen mit Migrationshintergrund gehören – liegt sie vermutlich noch höher. Einige wenige Studien aus Deutschland und Österreich liefern Hinweise auf Unterschiede in der Inzidenz von Gestationsdiabetes zwischen Migrantinnen und der Allgemeinbevölkerung. Demnach scheinen Frauen aus der Türkei, aber auch aus Osteuropa und den Mittelmeerländern besonders betroffen zu sein [7, 9, 10]. Studien aus den USA zeigen ebenfalls zum Teil deutliche ethnische Unterschiede in der Prävalenz von Gestationsdiabetes mit erhöhten Häufigkeiten vor allem bei asiatischstämmigen Frauen [11–13].

Unter den Risikofaktoren für Gestationsdiabetes haben Übergewicht und Adipositas den größten Einfluss und stellen gleichzeitig eine besondere Herausforderung in der Betreuung dieser Schwangeren dar [14]. Sie können die Folge von zu geringer körperlicher Aktivität und einer zu kalorienreichen Ernährung sein. Auch das mütterliche Alter und das Vorliegen von Gestationsdiabetes in einer vorangegangenen Schwangerschaft stellen wichtige Risikofaktoren dar. Zudem gibt es Hinweise, dass der ethnische Hintergrund und ein Typ-2-Diabetes in der Familiengeschichte das Risiko für Gestationsdiabetes signifikant erhöhen [15]. Ethnische Unterschiede im Auftreten von Gestationsdiabetes können vermutlich zum Teil durch die Unterschiede in der Adipositasprävalenz erklärt werden [16, 17]. In Deutschland ist die Adipositasprävalenz bei türkischen Migrantinnen höher als in der Allgemeinbevölkerung [18, 19].

Die vorliegende Studie untersucht exemplarisch anhand eines Datensatzes der AOK Berlin, ob sich im Vergleich zwischen türkischen und deutschen Frauen Unterschiede zeigen hinsichtlich:

- ▶ der Inzidenz von Gestationsdiabetes,
- ▶ der Häufigkeit ausgewählter Risikofaktoren für Gestationsdiabetes,
- ▶ Geburtsoutcomes der Frauen mit und ohne Gestationsdiabetes.

## Methoden

### Datensatz

Für die vorliegende Studie wurden alle schwangerschaftsbezogenen Abrechnungsdaten der AOK Berlin aus den Jahren 2005 bis 2007 ausgewertet. Dabei stützten wir uns auf anonymisierte Versichertenstammdaten, Krankenhausfalldaten und Krankenhausdiagnosen (ursprüngliche Quelle: UB KH Abrechnungsergebnisdaten) sowie ambulante Diagnosen (ursprüngliche Quelle: Kassenärztliche Vereinigungen). Die ganzjährig bei der AOK Berlin versicherten Schwangeren wurden anhand verschiedener Schwangerschaftsmarker wie Einlings-, Mehrlingsschwangerschaft oder Abort von einem Mitarbeiter der AOK Berlin aus dem Gesamtdatenbestand extrahiert. Dazu wurden die Angaben der überlebenden (mit-)versicherten Kinder ergänzt. Im Vorfeld war eine aufwendige Aufbereitung der Datensätze notwendig, weil die Daten der AOK in verschiedenen Excel-Dateien und so zum einen getrennt nach Leistungsbereichen und zum anderen jeweils getrennt nach ICD-Diagnosen und abgerechneten Leistungen vorlagen. In den Krankenhausdaten wurden in der Regel die Krankenhausentlassungsdiagnosen zur Bestimmung der Studienpopulation hinzugezogen. Da die für uns wichtigen Diagnosen aber zum Teil in den Haupt- und Nebendiagnosen zu finden waren, mussten alle 3 Diagnosekategorien untereinander abgeglichen und ergänzt werden. Nach der Plausibilitätsprüfung und Aufbereitung wurden die verschiedenen Datensätze anhand einer individuellen Pseudoversichertennummer zusammengespielt.

Ein Ethikvotum war für diese Studie nicht notwendig, da wir die Kriterien der „Guten Epidemiologischen Praxis Sekundärdatenanalyse“ (GPS) der deutschen epidemiologischen Gesellschaften eingehalten haben. Demnach wurden in allen Phasen der Studie die Regeln des Datenschutzes für Sekundärdatenauswertungen eingehalten. Für die Auswertung wurden anonymisierte Daten verwendet, sodass eine Re-Identifikation von Personen nicht möglich war.

### Ein- und Ausschlusskriterien

Der rohe Datensatz bestand aus 4820 Schwangerschaften. Haupteinschlusskriterium in dieser Studie war die Diagnose „Einling“ aus den Haupt-, Neben- oder Entlassungsdiagnosen der Krankenhausabrechnungen.

In dieser Analyse wurden folgende Datensätze schrittweise ausgeschlossen und damit nicht berücksichtigt:

- ▶ Aborte, Fetaltod, totgeborener Einling, Extrauterin gravidität, Blasenmole (n = 596)
- ▶ Mehrfachschwangerschaften oder -abrechnungen im Zeitraum 2005–2007 (n = 420)
- ▶ Mehrlingsschwangerschaften (n = 44)
- ▶ keine eindeutige Zuordnung „Einling“ möglich (n = 4)
- ▶ Mutter älter als 52 oder jünger als 15 bei Geburt (n = 5), oder Missing beim Alter (n = 196)
- ▶ uneindeutige Diagnose Gestationsdiabetes (n = 217)

Letztendlich wurden Daten von 3338 Schwangerschaften von AOK-Berlin-Versicherten in die Analyse einbezogen.

### Definition des Outcomes

Gestationsdiabetes wurde anhand des ICD-Codes O24.4 „Diabetes mellitus, während der Schwangerschaft auftretend“ in den diagnosebezogenen Abrechnungsdaten identifiziert.

Hauptproblem dabei war die Überschneidung mit anderen Diabetesdiagnosen. So wurden von den insgesamt 751 Fällen (20,4%) mit der Diagnose O24.4 nur 534 (16,0%) in die Analyse eingeschlossen, da Überschneidungen mit den schwangerschaftsbezogenen Diabetesdiagnosen „DM in der Schwangerschaft, nicht näher bezeichnet (O24.9)“ (n = 59), „DM in der Schwangerschaft: vorher bestehender DM-Typ-1 (O24.0)“ (n = 20) oder „DM in der Schwangerschaft: vorher bestehender DM-Typ-2 (O24.1)“ (n = 9) bestanden. Darüber hinaus wurden auch alle Fälle von Gestationsdiabetes ausgeschlossen, die eine Diagnose „Diabetes-Typ-1“ (n = 114), „Diabetes-Typ-2“ (n = 34) oder „Diabetes nicht näher bezeichnet“ (n = 38) hatten. Diese Fälle wurden ausgeschlossen, da die zeitliche Abfolge des Auftretens der Erkrankung nicht geklärt werden konnte.

Die Inzidenz von Gestationsdiabetes beschreiben wir in dieser Studie als neu aufgetretene Fälle von Gestationsdiabetes pro 1000 Schwangerschaften im Zeitraum 2005 bis 2007.

### Bestimmung des Migrationshintergrunds

Da in den Daten der AOK keine zuverlässigen Daten zum Migrationshintergrund erhoben werden, wurde ein Namensalgorithmus zur Unterscheidung von türkischstämmigen und nicht türkischstämmigen Frauen anhand ihrer Vor- und Familiennamen angewendet.

Der Namensalgorithmus besteht aus einem SAS-Programm, in dem automatisch sichere und mögliche türkische Fälle identifiziert werden. In einem zusätzlichen „manuellen“ Teil wurden die Fälle, die als möglich türkisch identifiziert wurden, von einer türkischstämmigen Mitarbeiterin vor Ort einzeln überprüft und evaluiert. Die Performanz des Algorithmus wurde in einer früheren Studie anhand eines manuell erstellten Goldstandards ermittelt und stellt sich als sehr gut dar (Sensitivität und Spezifität > 97,5%) [20]. Weitere Details zum Algorithmus sind an anderer Stelle beschrieben [21,22]. Um den Datenschutz einzuhalten, wurde der Namensalgorithmus unter Aufsicht bei der AOK Berlin vor Ort angewendet. Wir betrachten in dieser Studie die Personen, die wir aufgrund ihres Namens als türkischstämmig identifizieren konnten, als Personen mit türkischem Migrationshintergrund. Sie werden im Folgenden kurz als „türkischstämmig“ bezeichnet. Als Vergleichsgruppe wurden insgesamt 2418 Schwangerschaften von deutschen Frauen zufällig anhand einer pseudonymisierten Versichertennummer aus dem Datenbestand der AOK Berlin ausgewählt. Als deutsch wurden alle Frauen definiert, die nach dem AOK-Nationalitätskennzeichen „deutsch“ und nach dem neuen Herkunftskennzeichen des Namensalgorithmus als „nicht türkisch“ ausgewiesen wurden.

### Statistische Analyse

Die Analyse der Daten erfolgte mit dem Statistikprogramm SAS (Statistical Analysis System, SAS Institute Inc., Version 9.2). Anteile und stratifizierte Analysen stammen aus Kreuztabellen. Die Merkmale wurden mittels des  $\chi^2$ -Tests auf statistische Zusammenhänge untersucht. Alle berechneten p-Werte sind 2-seitig. Es wurde nicht für das Testen mehrerer Variablen kontrolliert. Die Ergebnisse sind daher rein deskriptiv zu verstehen.

Darüber hinaus wurden binäre logistische Regressionsmodelle berechnet für die Wahrscheinlichkeit des Auftretens von Gestationsdiabetes und für wichtige Risikofaktoren adjustiert. In einem multiplen Modell zum Einfluss von Migrationshintergrund auf Gestationsdiabetes sollte untersucht werden, ob der Migrationshintergrund nach Adjustierung für Alter der Mutter und Adipositas einen unabhängigen Einfluss auf das Auftreten von Gesta-

tionsdiabetes hat. Darüber hinaus lag ein Fokus auf der Untersuchung des gemeinsamen Effekts von Migrationshintergrund und Adipositas auf das Auftreten von Gestationsdiabetes. Dafür wurde mittels neu erstellter Dummy-Variablen ein Interaktionsterm [Migrationsstatus (türkischstämmig/deutsch) \* Adipositas (ja/nein)] gebildet. Dieser wurde zum einen im binär logistischen Modell nach Alter adjustiert und zum anderen stratifiziert für die 3 Altersgruppen (unter 25, 25–34, über 34) untersucht. Weitere mögliche Confounder, wie sozioökonomischer Status, konnten aufgrund der großen Anzahl von Missings oder weil die Variablen nicht im Datensatz vorhanden waren, nicht getestet werden.

### Ergebnisse

Die Charakteristika der Studienpopulation nach Herkunft der Mutter sind in **Tab. 1** dargestellt. Signifikante Unterschiede zwischen türkischstämmigen und deutschen Frauen zeigten sich in der Altersverteilung der Mütter. So war der Anteil der Schwangeren unter 25 Jahren bei den Türkinnen geringer als bei den Deutschen, bei den über 34-Jährigen dagegen mit knapp 16% etwas höher als bei den deutschen Frauen (15,5%). Die Anteile der Frauen mit übermäßiger Gewichtszunahme oder einer Prä-

**Tab. 1** Charakteristika der Studienpopulation nach Herkunft der Mutter, Abrechnungsdaten der AOK Berlin, 2005–2007.

|                                                          | türkisch |      | deutsch |      | p-Wert  |
|----------------------------------------------------------|----------|------|---------|------|---------|
|                                                          | n        | %    | n       | %    |         |
| <b>Alter der Mutter (in Jahren)</b>                      |          |      |         |      |         |
| unter 25                                                 | 483      | 28,0 | 674     | 38,0 | < 0,001 |
| 25–34                                                    | 970      | 56,2 | 824     | 46,5 |         |
| über 34                                                  | 274      | 15,9 | 275     | 15,5 |         |
| <b>Methode der Entbindung</b>                            |          |      |         |      |         |
| spontan                                                  | 1308     | 75,4 | 1329    | 75,0 | 0,796   |
| instrumentell                                            | 111      | 6,4  | 131     | 7,4  |         |
| Kaiserschnitt                                            | 308      | 17,8 | 313     | 17,7 |         |
| ▶ primär                                                 | 119      | 6,9  | 127     | 7,2  |         |
| ▶ sekundär                                               | 174      | 10,1 | 169     | 9,5  |         |
| ▶ sonstige                                               | 15       | 0,9  | 17      | 1,0  |         |
| <b>Adipositas</b>                                        |          |      |         |      |         |
| ja                                                       | 307      | 17,8 | 282     | 15,9 | 0,139   |
| nein                                                     | 1420     | 82,2 | 1491    | 84,1 |         |
| <b>übermäßige Gewichtszunahme in der Schwangerschaft</b> |          |      |         |      |         |
| ja                                                       | 77       | 4,5  | 56      | 3,2  | 0,044   |
| nein                                                     | 1650     | 95,5 | 1717    | 96,8 |         |
| <b>Präeklampsie in der Schwangerschaft</b>               |          |      |         |      |         |
| ja                                                       | 562      | 32,5 | 483     | 27,2 | < 0,001 |
| nein                                                     | 1165     | 67,5 | 1290    | 72,8 |         |
| <b>übergewichtiges Neugeborenes</b>                      |          |      |         |      |         |
| ja                                                       | 54       | 3,1  | 56      | 3,2  | 0,957   |
| nein                                                     | 1673     | 96,9 | 1717    | 96,8 |         |
| <b>Schwangerschaftsdauer (in Wochen)</b>                 |          |      |         |      |         |
| 5–13                                                     | 25       | 1,5  | 48      | 2,7  | < 0,001 |
| 14–19                                                    | 13       | 0,8  | 26      | 1,5  |         |
| 20–25                                                    | 15       | 0,9  | 24      | 1,4  |         |
| 26–33                                                    | 19       | 1,1  | 46      | 2,6  |         |
| 34–36                                                    | 53       | 3,1  | 83      | 4,7  |         |
| 37–41                                                    | 1401     | 81,1 | 1257    | 70,9 |         |
| 41+                                                      | 178      | 10,3 | 190     | 10,7 |         |
| keine Angabe                                             | 23       | 1,3  | 99      | 5,6  |         |
| <b>Frühgeburt (&lt; 26. Woche)</b>                       |          |      |         |      |         |
| ja                                                       | 312      | 18,1 | 251     | 14,2 | 0,001   |
| nein                                                     | 1415     | 81,9 | 1522    | 85,8 |         |

eklapsie während der Schwangerschaft sowie einer Frühgeburt waren bei den Türiinnen signifikant höher als bei den Deutschen. Die Adipositasprävalenz war mit knapp 18% etwas höher bei den Türiinnen. Keine bedeutenden Unterschiede zwischen Türiern und Deutschen gab es hinsichtlich der Diagnose „übergewichtiges Neugeborenes“ und der Methode der Entbindung.

• **Tab. 2** zeigt die Anzahl der neu aufgetretenen Fälle mit Gestationsdiabetes und die Inzidenz pro 1000 Schwangerschaften im Zeitraum 2005 bis 2007 nach Herkunft der Mutter und stratifiziert nach ausgewählten Risikofaktoren und Geburtsoutcomes. In der Gesamtinzidenz gab es statistisch signifikante Unterschiede zwischen türkischstämmigen und deutschen Frauen; bei den türkischstämmigen Frauen lag die Inzidenz mit 183 pro 1000 Schwangerschaften im Zeitraum 2005 bis 2007 (n = 301) im Vergleich zu 138 pro 1000 Schwangerschaften bei den deutschen Frauen (n = 233) deutlich höher (p < 0,01). Betrachtet man die Inzidenz stratifiziert nach Alter, so fällt auf, dass sie v.a. in der Gruppe türkischstämmiger Frauen über 34 Jahre im Vergleich zu

den jüngeren Altersgruppen und im Vergleich zu den deutschen Frauen sehr hoch ist (226 pro 1000 Schwangerschaften). Auffällig sind die deutlich höheren Gestationsdiabetesinzidenzen bei türkischen Frauen mit Adipositas (287 pro 1000 Schwangerschaften) und übermäßiger Gewichtszunahme in der Schwangerschaft (733 pro 1000 Schwangerschaften) im Vergleich zu den deutschen Frauen (194 bzw. 278 pro 1000 Schwangerschaften). Obwohl es signifikante Unterschiede in der Frühgeburtslichkeit gab, ist die Gestationsdiabetesinzidenz bei türkischstämmigen und deutschen Frauen mit einer Frühgeburt vergleichbar (130 pro 1000 Schwangerschaften).

Ergebnisse der Regressionsanalysen sind in • **Tab. 3** dargestellt. Der Faktor „türkische Herkunft der Mutter“ hat sowohl vor als auch nach der Adjustierung für Alter und Adipositas einen statistisch signifikanten Einfluss auf das Vorliegen von Gestationsdiabetes. Türkischstämmige Frauen hatten eine 1,4-mal so hohe Chance für Gestationsdiabetes wie deutsche Frauen (95%-KI = 1,12–1,63). Darüber hinaus steigt die Chance mit zunehmendem Alter. Den größten einzelnen Effekt auf das Auftreten von Gestationsdiabetes hatte Adipositas (OR = 1,9; 95%-KI = 1,5–2,4). Da die deskriptiven Ergebnisse auf einen Zusammenhang zwischen türkischer Herkunft und Adipositas hindeuten, haben wir in einem weiteren Regressionsmodell den Einfluss dieser möglichen Interaktion auf das Gestationsdiabetesrisiko untersucht (• **Tab. 3**). Adjustiert für Alter der Mutter hatten türkische Frauen mit Adipositas die vergleichsweise zu deutschen Frauen ohne Adipositas höchste Chance, während der Schwangerschaft einen Gestationsdiabetes zu bekommen (OR = 2,67). Die Odds Ratio war höher als bei deutschen Frauen mit Adipositas (OR = 1,66) und sogar deutlich höher im Vergleich zu türkischen Frauen ohne Adipositas (OR = 1,3). Eine weitere Stratifizierung nach Alter zeigt, dass im Vergleich zu den anderen Altersgruppen vor allem adipöse, türkischstämmige Frauen unter 25 Jahren eine deutlich

**Tab. 2** Gestationsdiabetesinzidenz nach Herkunft der Mutter, stratifiziert für ausgewählte Risikofaktoren und Schwangerschafts- und Geburtsoutcomes, Abrechnungsdaten der AOK Berlin (n = 3338).

| ICD-Code:<br>O24.4*                                      | türkisch (n = 1647) |                    | deutsch (n = 1691) |                    |
|----------------------------------------------------------|---------------------|--------------------|--------------------|--------------------|
|                                                          | neue Fälle          | Inzidenz pro 1000* | neue Fälle         | Inzidenz pro 1000* |
| <b>gesamt</b>                                            | <b>(301)</b>        | <b>183</b>         | <b>(233)</b>       | <b>138</b>         |
| <b>Alter</b>                                             |                     |                    |                    |                    |
| unter 25                                                 | (73)                | 159                | (73)               | 112                |
| 25–34                                                    | (169)               | 182                | (119)              | 152                |
| über 34                                                  | (59)                | 226                | (41)               | 158                |
| <b>Methode der Entbindung</b>                            |                     |                    |                    |                    |
| spontan*                                                 | (237)               | 189                | (165)              | 131                |
| instrumentell                                            | (16)                | 157                | (17)               | 132                |
| Kaiserschnitt                                            | (48)                | 165                | (51)               | 171                |
| ▶ primär                                                 | (17)                | 155                | (13)               | 109                |
| ▶ sekundär                                               | (26)                | 157                | (33)               | 201                |
| ▶ sonstige                                               | (5)                 | 333                | (5)                | 313                |
| <b>Adipositas</b>                                        |                     |                    |                    |                    |
| ja                                                       | (83)                | 287                | (52)               | 194                |
| nein                                                     | (218)               | 161                | (181)              | 127                |
| <b>übermäßige Gewichtszunahme in der Schwangerschaft</b> |                     |                    |                    |                    |
| ja                                                       | (55)                | 733                | (15)               | 278                |
| nein                                                     | (246)               | 157                | (218)              | 133                |
| <b>Präeklampsie in der Schwangerschaft</b>               |                     |                    |                    |                    |
| ja                                                       | (115)               | 213                | (79)               | 172                |
| nein                                                     | (186)               | 168                | (154)              | 125                |
| <b>übergewichtiges Neugeborenes</b>                      |                     |                    |                    |                    |
| ja                                                       | (13)                | 260                | (14)               | 255                |
| nein                                                     | (288)               | 180                | (219)              | 134                |
| <b>Schwangerschaftsdauer (in Wochen)</b>                 |                     |                    |                    |                    |
| 5–13                                                     | (7)                 | 280                | (4)                | 83                 |
| 14–19                                                    | (1)                 | 83                 | (3)                | 115                |
| 20–25                                                    | (5)                 | 333                | (0)                | 0                  |
| 26–33                                                    | (2)                 | 111                | (9)                | 200                |
| 34–36                                                    | (15)                | 294                | (9)                | 110                |
| 37–41                                                    | (241)               | 181                | (172)              | 144                |
| 41+                                                      | (26)                | 154                | (29)               | 161                |
| keine Angabe                                             | (4)                 | 182                | (7)                | 75                 |
| <b>Frühgeburt (&lt; 26. Woche)</b>                       |                     |                    |                    |                    |
| ja                                                       | (39)                | 132                | (33)               | 136                |
| nein                                                     | (262)               | 194                | (200)              | 138                |

\* neuauftretene Fälle von Gestationsdiabetes pro 1000 Schwangerschaften im Zeitraum 2005–2007

**Tab. 3** Einfluss der Herkunft auf Gestationsdiabetes, adjustiert für wichtige Risikofaktoren (Ergebnisse der einfachen und multiplen logistischen Regression).

|                                     | einfache log. Regression |           | multiple log. Regression |           |
|-------------------------------------|--------------------------|-----------|--------------------------|-----------|
|                                     | rohes OR                 | 95%-KI    | adjustiertes OR          | 95%-KI    |
| <b>Herkunft der Mutter</b>          |                          |           |                          |           |
| türkisch                            | 1,40                     | 1,16–1,69 | 1,35                     | 1,12–1,63 |
| deutsch                             | 1                        |           | 1                        |           |
| <b>Alter der Mutter (in Jahren)</b> |                          |           |                          |           |
| unter 25                            | 1                        |           | 1                        |           |
| 25–34                               | 1,34                     | 1,09–1,66 | 1,28                     | 1,03–1,59 |
| über 34                             | 1,57                     | 1,19–2,08 | 1,51                     | 1,14–2,00 |
| <b>Adipositas</b>                   |                          |           |                          |           |
| ja                                  | 1,91                     | 1,53–2,38 | 1,89                     | 1,51–2,35 |
| nein                                | 1                        |           | 1                        |           |
| <b>Herkunft* Adipositas*</b>        |                          |           |                          |           |
| türkisch mit Adipositas             | 2,77                     | 2,05–3,73 | 2,67                     | 1,97–3,60 |
| türkisch ohne Adipositas            | 1,31                     | 1,06–1,62 | 1,29                     | 1,18–2,34 |
| deutsch mit Adipositas              | 1,65                     | 1,18–2,32 | 1,66                     | 1,04–2,59 |
| deutsch ohne Adipositas             | 1                        |           | 1                        |           |

\* zusätzlich adjustiert für Alter der Mutter

erhöhte Chance für Gestationsdiabetes haben (Daten nicht dargestellt).

## Diskussion

Diese Studie beschreibt erstmals das Auftreten von Gestationsdiabetes im Vergleich zwischen türkischen und deutschen Frauen in Deutschland auf der Grundlage von Krankenkassenabrechnungsdaten der AOK Berlin. Neben bekannten Risikofaktoren für das Auftreten von Gestationsdiabetes wie dem Alter oder dem Vorliegen einer Adipositas bei der Mutter zeigt sich die türkische Herkunft als ein weiterer unabhängiger Risikofaktor. Das Risiko türkischstämmiger Personen ist insbesondere dann erhöht, wenn sie adipös sind.

Auf Basis der Daten aus den Jahren 2005 bis 2007 konnten wir signifikante Unterschiede zwischen türkischstämmigen und deutschen Frauen in der Inzidenz von Gestationsdiabetes finden. Dieses Ergebnis ist konsistent mit anderen Studien aus Deutschland und Österreich [7,9,10]. Darüber hinaus weist unsere Auswertung auf eine besondere Risikogruppe für Gestationsdiabetes hin: junge, türkische Frauen mit Adipositas hatten die höchste Chance zu erkranken.

Die Interpretation der Unterschiede im Auftreten von Gestationsdiabetes unterliegt Einschränkungen, die sich vor allem aus der Struktur des Datensatzes ergeben. Weil die Daten der Krankenkassen zu anderen Zwecken als für wissenschaftliche Auswertungen gesammelt werden, fehlen zum Teil wichtige Informationen wie soziodemografische und anamnestiche Informationen. Daher war es nicht möglich, bspw. den potenziellen Einfluss des sozioökonomischen Status der Schwangeren auf das Auftreten von Gestationsdiabetes mit in die Analyse einzubeziehen. Auch fehlen Informationen zu weiteren wichtigen Risikofaktoren für Gestationsdiabetes wie z.B. Angaben zu Fehlgeburten, Diabetes mellitus Typ 2 in der Familie oder ob in einer vorangegangenen Schwangerschaft bereits ein Gestationsdiabetes bestand. Daher kann nicht ausgeschlossen werden, dass die erhöhte Gestationsdiabetesinzidenz bei türkischstämmigen Migranten in unserer Studie auch auf eine höhere Prävalenz weiterer hier nicht untersuchter Risikofaktoren für Gestationsdiabetes in dieser Gruppe zurückgeführt werden kann. Eine weitere Einschränkung ist die nicht gesicherte Validität und Präzision der Dokumentation einzelner Angaben. Die Abrechnungsdaten insbesondere im ambulanten Bereich basieren auf der Dokumentation der Ärztinnen und Ärzte und sind damit abhängig vom Kodierverhalten. Bei Anwendung von „Abrechnungsdiagnosen“ müssen daher klare Ein- und Ausschlusskriterien für die untersuchte Population benannt werden [23]. Wir haben in unserer Studie eine konservative Methode gewählt und alle Frauen ausgeschlossen, die mehr als einen ICD-Code für eine Diabetesdiagnose oder nicht eindeutige Diagnosen hatten. Eine weitere Validierung der Diagnosen war in dieser Studie nicht möglich. Auffällig ist das in unserer Studie sehr häufige Auftreten von Präeklampsie. Hier erscheint eine Überschätzung möglich, die mit dem Kodierverhalten der Ärzte zusammenhängen kann. Es liegen aber keine Hinweise dafür vor, dass diese mögliche Verzerrung differenziell, d. h. in unterschiedlicher Stärke, bei den türkischen und deutschen Frauen vorliegen könnte. Die Vergleiche zwischen beiden Gruppen sind daher valide. Die Daten sind lediglich repräsentativ für die bei der AOK versicherten Frauen in Berlin. Eine bevölkerungsweite Aussage ist mit dieser Studie nicht möglich, da sich die Studienpopulation

hinsichtlich sozioökonomischer und weiterer individueller Faktoren von der Allgemeinbevölkerung unterscheiden kann.

Trotz dieser methodischen Einschränkungen weist diese Studie eine Reihe von Stärken auf. Uns standen personenbezogene und nicht wie in den meisten routinemäßigen Datensätzen fallbezogene Daten zur Verfügung. So konnten wir personenbezogen alle vorhandenen relevanten Informationen sektorübergreifend zusammenführen und auswerten. Darüber hinaus ist das Risiko systematischer Selektionseffekte vergleichsweise gering. Das ist einerseits auf die hohe Vollständigkeit, bezogen auf die Zielpopulation, zurückzuführen. So wurden in dieser Studie alle im Zeitraum 2005 bis 2007 bei der AOK Berlin versicherten türkischen Frauen mit einem lebendgeborenen Einling einbezogen. Andererseits können durch die routinemäßige Dokumentation Verzerrungen durch selektive Nonresponse der Studienpopulation bzw. Verzerrungen durch selektive Angaben von Studienteilnehmern weitestgehend ausgeschlossen werden [24]. In den Daten der AOK Berlin sind keine validen Informationen über den Migrationshintergrund der versicherten Frauen vorhanden. Eine Stärke dieser Studie ist die Anwendung des Namensalgorithmus zur Unterscheidung nach türkischer und nicht türkischer Herkunft, wodurch auch Frauen türkischer Herkunft mit deutscher Staatsangehörigkeit eingeschlossen werden konnten, und die erstmalige Verbindung dieser Information mit den Diagnosen zu Gestationsdiabetes und möglichen Risikofaktoren.

Wir konnten mit unseren Daten zeigen, dass Adipositas eine wichtige Rolle in der Erklärung einer höheren Inzidenz von Gestationsdiabetes besonders bei jüngeren türkischen Migrantinnen spielt. Gezielte Präventionsmaßnahmen für diese Frauen sollten bereits vor oder spätestens zu Beginn der Schwangerschaft ansetzen. Darüber hinaus sollte sie im Rahmen der Schwangerenvorsorge eine wichtige Zielgruppe gezielter Aufklärung über Gestationsdiabetes durch die begleitenden Frauenärzte sein. Auch wenn türkische Migrantinnen nicht unbedingt seltener zur Schwangerenvorsorge gehen, gibt es Hinweise auf Defizite im Versorgungsprozess der Schwangerenvorsorge bei ausländischen Frauen [25]. Sprachliche Probleme und Unterschiede im Gesund- und Krankheitsverständnis der Schwangeren mit Migrationshintergrund stellen dabei wichtige Barrieren dar und können den Versorgungsprozess behindern. Da die Versorgung von Patienten mit (Gestations-)Diabetes eine umfassende Aufklärung und hohe Compliance erfordern, sollten zukünftige Studien klären, inwieweit Unterschiede in der Gestationsdiabetesinzidenz und späteren Geburtsoutcomes zwischen Migrantinnen und Nichtmigrantinnen Zugangsbarrieren zur Versorgung oder Defizite in der Schwangerenvorsorge und damit verbundene geringere Adhärenz und Compliance der türkischstämmigen Frauen widerspiegeln.

## Danksagung

Wir danken Henry Kotek und Manfred Jebram von der AOK Berlin für die Bereitstellung und Zusammenstellung der Daten und Kai Kolpatzik vom AOK-Bundesverband für seine Unterstützung.

## Interessenkonflikt

Diese Studie wurde gefördert durch Mittel des AOK-Bundesverbands im Rahmen einer Expertise zur perinatalen Gesundheit von Kindern mit Migrationshintergrund in Deutschland. Der

Geldgeber hat weder auf die Entwicklung der Forschungsfrage noch auf die Datenanalyse und -interpretation Einfluss genommen.

#### Literatur

- 1 Kainer F. Gestationsdiabetes. In: Dudenhausen JW, Schneider HPG, Bastert G, Hrsg. Frauenheilkunde und Geburtshilfe. Berlin: Walter de Gruyter; 2003: 186–189
- 2 Plagemann A, Harder T, Dudenhausen JW. Mechanismen perinataler Programmierung am Beispiel der Körpergewichts- und Stoffwechselfregulation. Gynäkologe 2007; 40: 248–255
- 3 Weiss PA, Walcher W, Scholz HS. Der vernachlässigte Gestationsdiabetes: Risiken und Folgen. Geburtsh Frauenheilk 1999; 59: 535–544
- 4 Kuh D, Ben-Shlomo Y, Hrsg. A Life-Course Approach to chronic Disease Epidemiology. New York: Oxford University Press; 2005
- 5 Boney CM, Verma A, Tucker R et al. Metabolic syndrome in childhood: association with birth weight, maternal obesity, and gestational diabetes mellitus. Pediatrics 2005; 115: e290–e296
- 6 Kleinwechter H, Schäfer-Graf U. Diabetes und Schwangerschaft. In: diabetesDE, Hrsg. Deutscher Gesundheitsbericht. Diabetes 2011. Mainz: Kirchheim Verlag; 2011: 131–138
- 7 Bühling KJ, Stein U, Dudenhausen J. Evaluation des 50 g-Glukose-Screeningtests an 1416 Schwangeren. Geburtsh Frauenheilk 1998; 58: 100–109
- 8 Festa A, Schwarzmaier A, Bechter B et al. Anwendung eines sensitiven Verfahrens zur Diagnostik des Gestationsdiabetes. Metabolische und klinische Ergebnisse. Geburtsh Frauenheilk 2001; 61: 79–84
- 9 Schneider S, Hoefl B, Freerksen N et al. Neonatal complications and risk factors among women with gestational diabetes mellitus. Acta Obstet Gynecol Scand 2010; DOI: 10.1111/j.1600-0412.2010.01040.x
- 10 Tammaa A, Teich G, Scholl T et al. Ethnologie als Risikofaktor für Gestationsdiabetes in Mitteleuropa. Geburtsh Frauenheilk 2001; 61: 142–146
- 11 Thorpe LE, Berger D, Ellis JA et al. Trends and racial/ethnic disparities in gestational diabetes among pregnant women in New York City, 1990–2001. Am J Public Health 2005; 95: 1536–1539
- 12 Rosenberg TJ, Garbers S, Lipkind H et al. Maternal obesity and diabetes as risk factors for adverse pregnancy outcomes: differences among 4 racial/ethnic groups. Am J Public Health 2005; 95: 1545–1551
- 13 Mocarski M, Savitz DA. Ethnic differences in the association between gestational diabetes and pregnancy outcome. Matern Child Health J 2011; DOI: 10.1007/s10995-011-0760-6
- 14 Hartge DR, Dawson A, Bohlmann MK et al. Gravidas with a BMI above 25: challenges in antenatal and peripartur monitoring. Geburtsh Frauenheilk 2010; 70: 463–471
- 15 Galtier F. Definition, epidemiology, risk factors. Diabetes Metab 2010; 36: 628–651
- 16 Green JR, Pawson IG, Schumacher LB et al. Glucose tolerance in pregnancy: ethnic variation and influence of body habitus. Am J Obstet Gynecol 1990; 163: 86–92
- 17 Straube S, Voigt M, Hesse V et al. Comparison of anthropometric characteristics of German-born vs. Asian-born mothers and their neonates – an analysis of the German perinatal survey (19th communication). Geburtsh Frauenheilk 2010; 70: 472–477
- 18 Razum O, Zeeb H, Meesmann U et al.; Robert Koch-Institut, Hrsg. Migration und Gesundheit. Schwerpunktbericht der Gesundheitsberichterstattung des Bundes. Berlin: Robert Koch-Institut; 2008
- 19 Reeske A, Spallek J, Razum O. Changes in cardiovascular risk factors among first and second generation Turkish migrants in Germany – an analysis of the Mikrozensus 2005. Eur J Public Health 2007; 17 (Suppl. 2): 64
- 20 Spallek J, Kaatsch P, Spix C et al. Namensbasierte Identifizierung von Fällen mit türkischer Herkunft im Kinderkrebsregister Mainz. Gesundheitswesen 2006; 68: 643–649
- 21 Razum O, Zeeb H, Akgün S. How useful is a name-based algorithm in health research among Turkish migrants in Germany? Trop Med Int Health 2001; 6: 654–661
- 22 Razum O, Zeeb H, Beck K et al. Combining a name algorithm with a capture-recapture method to retrieve cases of Turkish descent in a German population-based cancer registry. Eur J Cancer 2000; 36: 2380–2384
- 23 Schubert I, Köster I, Küpper-Nybelen J et al. Versorgungsforschung mit GKV-Routinedaten. Bundesgesundheitsbl 2008; 51: 1095–1105
- 24 Hoffmann F, Andersohn F, Giersiepen K et al. Validierung von Sekundärdaten. Bundesgesundheitsbl 2008; 51: 1118–1126
- 25 Tadesse R, Jahn A, Razum O. How well do doctors document their findings in antenatal care – and are there differences between women of German and non-German nationality? 5. Arbeitstagung der FIDE 1999
